# Supplementary material
Source: publisher site journal article supplement (https://www.dovepress.com/article/488604)
Supplement: Supplementary file 1 [file get_supplementary_file.php]

Table S1: Laboratory test and Descriptions

| **Test Name** | **Description** |
| --- | --- |
| Creatinine | Assessing the concentration of creatinine in the bloodstream as a means of evaluating kidney performance. |
| International Normalized Ratio (INR) | A blood test used to measure the time it takes for blood to clot. It is a standardized way to report the results of the prothrombin time (PT). |
| Hemoglobin (Hgb) | Hemoglobin (Hgb) is a compound protein consisting of heme and globin. It is generated within the immature red blood cells. Cellular synthesis ceases upon the cell reaching maturity while circulating. One red blood cell contains approximately 300 million molecules of hemoglobin (Hgb). Hemoglobin (Hgb) is quantified in units of grams per deciliter (g/dL). |
| Mean Corpuscular Hemoglobin (MCH) | This number represents the index that quantifies the average weight of hemoglobin in the red blood cells. A change in mean corpuscular hemoglobin (MCH) typically corresponds to changes in mean corpuscular volume (MCV). |
| Mean Corpuscular Volume (MCV) | Characterizes the red blood cells based on their size or volume. This technique utilizes the dimensions of the red blood cells (RBC) to detect potential causes of anemia and other illnesses. |
| Platelet Count (PLT) | Offers the count of platelets currently in circulation. |
| White Blood Cells Count (WBC) | Determines the total number of Phagocytes and immunocytes in the blood. |
| RED Blood Cells Count (RBC) | The RBC count is a component of the CBC that quantifies the concentration of red blood cells per cubic centimeter of blood. |
| Prothrombin Time (PT) | The function of platelets can be assessed by measuring the clotting time of a blood sample. The PT is the duration, measured in seconds, required for plasma to coagulate following the introduction of phospholipid, tissue factor (factor III), and calcium into the sample. |
| High Density Lipoprotein Cholesterol (HDL) | This test quantifies the level of high-density lipoprotein (HDL) cholesterol in the bloodstream. |
| Urea Serum | Assessing urea nitrogen levels in the bloodstream as a measure of kidney function. |
| Triglyceride | This test quantifies the concentration of triglycerides in the bloodstream. It is a crucial sign of cardiovascular well-being. |
| Partial Thromboplastin Time (PTT) | aPTT is the duration, measured in seconds, required for plasma to coagulate following the introduction of a contact agent that completely activates factors XII, in addition to calcium and phospholipids. |

Table S2: Classifiers and their corresponding hyperparameters used to perform grid search optimization for the classifiers’ tunable parameters.

| **Classifier** | **Dataset** | **Parameters** |
| --- | --- | --- |
| RF | Clean dataset | 1. N_estimators: 50, 75, 100 2. Max_depth: None, 10, 20, 30 3. Min_samples_split: 2, 5, 10 4. Min_samples_leaf: 2, 4, 6 5. Bootstrap: True, False |
| SVM | Clean dataset | 1. C: 0.1, 1, 10 2. Kernel: linear, poly, sigmoid 3. Gamma: scale, auto 4. Degree (for the polynomial kernel): 2, 3, 4 5. Coef0: 0.0, 0.5, 1.0 |
| XGB1 & XGB2 | Dataset with NANs | 1. N_estimators: 50, 100, 200 2. Max_depth: 3, 5, 7 3. Learning_rate: 0.01, 0.1, 0.2 4. Subsample: 0.8, 1.0 5. Colsample_bytree: 0.8, 1.0 6. Gamma: 0, 0.1, 0.2 |
| HistGrBoost | Dataset with NANs | 1. Max_iter: 100, 200, 300 2. Max_depth: None, 5, 10 3. Learning_rate: 0.01, 0.1, 0.2 4. L2_regularization: 0, 0.1, 1 5. Max_leaf_nodes: 31, 63, 127 |
